# Supplementary material for: Reconstruction of drought and long-rain chronologies since the 17th century in central Japan using intra-annual tree-ring oxygen isotope ratios and documentary records
Source: Copernicus journal article supplement (doi:10.5194/cp-21-133-2025), 2025-01-21
Supplement: Supplementary file 1 [file cp-21-133-2025-supplement.pdf]

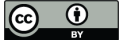

*Supplement of*

**Reconstruction of drought and long-rain chronologies since the 17th century in central Japan using intra-annual tree-ring oxygen isotope ratios and documentary records**

**Hiroto Iizuka et al.**

*Correspondence to:* Kenjiro Sho ([show@nitech.ac.jp](mailto:show@nitech.ac.jp))

The copyright of individual parts of the supplement might differ from the article licence.

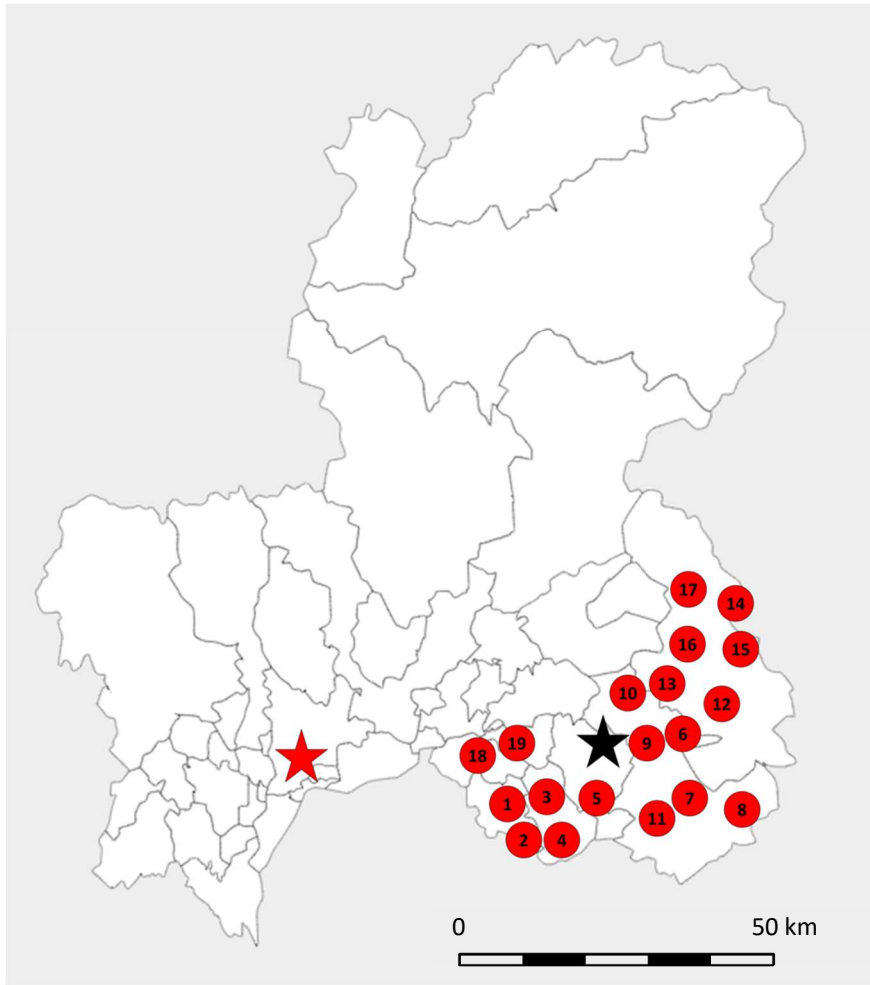

5 Fig. S1 Map of Gifu Prefecture showing the location of the municipalities of the Town/City histories used in this study (red solid circles) together with the location of the sample tree (black star) and the meteorological station (red star). The numbers within the red circles link to the numbers in Table S1. We collected 20 Town/City histories, 19 of which were issued by municipalities in the vicinity of the sampling site and one by Gifu Prefecture.

10

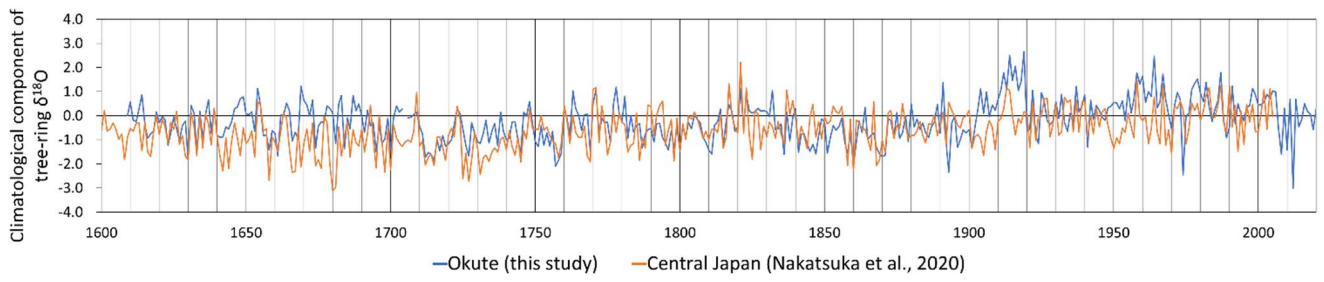

Fig. S2 Time-series graph of the climatological component of annual-averaged tree-ring  $\delta^{18}\text{O}$  of the sample tree of this study (blue line) and the central Japan master chronology (Nakatsuka et al., 2020, orange line)

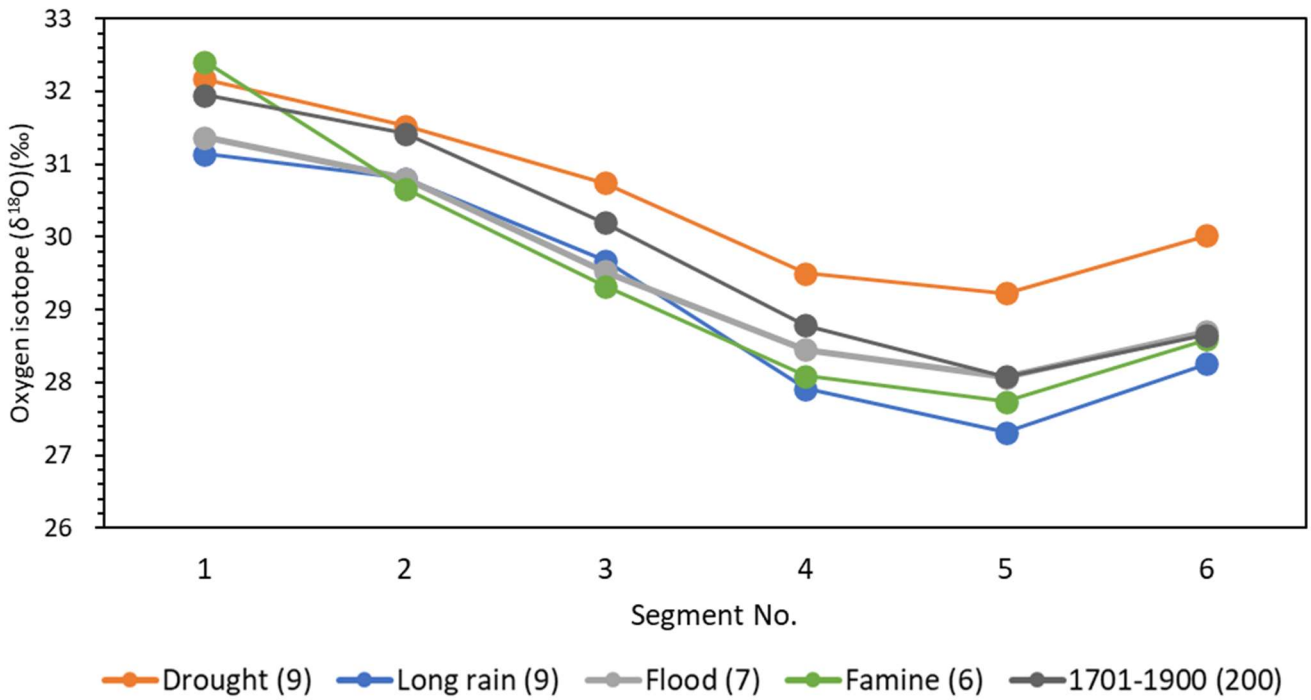

15 Fig. S3 Intra-ring  $\delta^{18}\text{O}$  variation by disaster types. The mean values of  $\delta^{18}\text{O}$  for the four types of disaster years and all years for the 1701–1900 period are indicated by solid dots. Numbers in the parentheses in the legend indicate the number of years belonging to each disaster type. Years of each disaster type were extracted as years for which the disaster description is found in  $\geq 3$  titles of Town/City history.

20 Table S1 List of Town/City histories used in this study.

| No. | Title                            | North longitude | East latitude | Year of publication |
|-----|----------------------------------|-----------------|---------------|---------------------|
| 1   | Tajimi City history              | 35° 20'         | 137° 08'      | 1980                |
| 2   | Kasahara Town history            | 35° 18'         | 137° 10'      | 1993                |
| 3   | Toki City history                | 35° 21'         | 137° 11'      | 1971                |
| 4   | Tumaki Village history           | 35° 19'         | 137° 11'      | 1931                |
| 5   | Mizunami City history            | 35° 22'         | 137° 15'      | 1974                |
| 6   | Ena City history                 | 35° 27'         | 137° 25'      | 1989                |
| 7   | Iwamura Town history             | 35° 22'         | 137° 26'      | 1961                |
| 8   | Kamiyahagi Town history          | 35° 18'         | 137° 30'      | 2008                |
| 9   | Takenami Town history            | 35° 27'         | 137° 20'      | 1993                |
| 10  | Nakanoho Town history            | 35° 31'         | 137° 18'      | 1968                |
| 11  | Yamaoka Town history             | 35° 21'         | 137° 23'      | 1984                |
| 12  | Nakatsugawa City history         | 35° 29'         | 137° 30'      | 1988                |
| 13  | Hirukawa Village history         | 35° 31'         | 137° 23'      | 1974                |
| 14  | Kawakami Village history         | 35° 37'         | 137° 30'      | 1983                |
| 15  | Sakashita Town history           | 35° 34'         | 137° 32'      | 2005                |
| 16  | Fukuoka Town history             | 35° 34'         | 137° 27'      | 1992                |
| 17  | Tukechi Town history             | 35° 40'         | 137° 26'      | 1974                |
| 18  | Kani City history                | 35° 26'         | 137° 04'      | 2010                |
| 19  | Mitake Town history              | 35° 26'         | 137° 08'      | 1992                |
| 20  | Gifu Prefecture disaster history | 35° 26'         | 136° 46'      | 1996                |

Table S2 Total number of disaster descriptions in a total of twenty titles of Town/City history in the Tono area for each of eight disaster types for each year in 1601–1900.

25

|      | Long rain | Drought | Flood | Heavy rain | Poor harvest | Famine | Heavy wind | Insect damage |
|------|-----------|---------|-------|------------|--------------|--------|------------|---------------|
| 1601 | 0         | 0       | 0     | 0          | 0            | 0      | 0          | 0             |
| 1602 | 0         | 0       | 0     | 0          | 0            | 0      | 0          | 0             |
| 1603 | 0         | 0       | 0     | 0          | 0            | 0      | 0          | 0             |
| 1604 | 0         | 0       | 0     | 0          | 0            | 0      | 0          | 0             |
| 1605 | 0         | 0       | 0     | 0          | 0            | 0      | 0          | 0             |
| 1606 | 0         | 0       | 0     | 0          | 0            | 0      | 0          | 0             |
| 1607 | 0         | 0       | 0     | 0          | 0            | 0      | 0          | 0             |
| 1608 | 0         | 0       | 1     | 0          | 0            | 0      | 0          | 0             |
| 1609 | 0         | 0       | 0     | 0          | 0            | 0      | 0          | 0             |
| 1610 | 0         | 0       | 2     | 0          | 0            | 0      | 0          | 0             |
| 1611 | 0         | 0       | 0     | 0          | 0            | 0      | 0          | 0             |
| 1612 | 0         | 0       | 0     | 0          | 0            | 0      | 0          | 0             |
| 1613 | 0         | 0       | 0     | 0          | 0            | 0      | 0          | 0             |
| 1614 | 0         | 0       | 1     | 0          | 0            | 0      | 0          | 0             |
| 1615 | 0         | 0       | 0     | 0          | 1            | 1      | 0          | 0             |
| 1616 | 0         | 0       | 0     | 0          | 0            | 0      | 0          | 0             |
| 1617 | 0         | 0       | 1     | 0          | 1            | 0      | 0          | 0             |
| 1618 | 0         | 0       | 0     | 0          | 0            | 0      | 0          | 0             |
| 1619 | 0         | 0       | 0     | 0          | 0            | 0      | 0          | 0             |
| 1620 | 1         | 0       | 0     | 0          | 0            | 1      | 0          | 0             |
| 1621 | 0         | 0       | 0     | 0          | 0            | 0      | 0          | 0             |
| 1622 | 0         | 0       | 0     | 0          | 1            | 0      | 0          | 0             |
| 1623 | 0         | 0       | 0     | 0          | 0            | 0      | 0          | 0             |
| 1624 | 0         | 0       | 0     | 0          | 0            | 0      | 0          | 0             |
| 1625 | 0         | 0       | 0     | 0          | 0            | 0      | 0          | 0             |
| 1626 | 0         | 0       | 0     | 0          | 0            | 0      | 0          | 0             |
| 1627 | 0         | 1       | 0     | 0          | 0            | 0      | 0          | 0             |
| 1628 | 0         | 0       | 0     | 0          | 0            | 0      | 0          | 0             |
| 1629 | 0         | 0       | 2     | 0          | 0            | 0      | 0          | 0             |
| 1630 | 0         | 0       | 0     | 0          | 0            | 1      | 0          | 0             |
| 1631 | 0         | 0       | 0     | 0          | 0            | 1      | 0          | 0             |
| 1632 | 0         | 0       | 0     | 0          | 0            | 0      | 0          | 0             |
| 1633 | 0         | 0       | 0     | 0          | 0            | 0      | 0          | 0             |
| 1634 | 0         | 0       | 0     | 0          | 0            | 0      | 0          | 0             |
| 1635 | 0         | 0       | 0     | 0          | 0            | 0      | 0          | 0             |
| 1636 | 0         | 0       | 0     | 0          | 0            | 0      | 0          | 0             |
| 1637 | 0         | 0       | 0     | 0          | 0            | 0      | 0          | 0             |
| 1638 | 0         | 0       | 1     | 0          | 0            | 0      | 0          | 0             |
| 1639 | 0         | 0       | 0     | 0          | 0            | 0      | 0          | 0             |
| 1640 | 0         | 0       | 0     | 0          | 1            | 1      | 0          | 0             |
| 1641 | 0         | 5       | 0     | 0          | 0            | 1      | 0          | 0             |
| 1642 | 1         | 0       | 0     | 0          | 2            | 6      | 0          | 0             |
| 1643 | 0         | 0       | 0     | 0          | 0            | 0      | 0          | 0             |
| 1644 | 0         | 0       | 0     | 0          | 0            | 0      | 0          | 0             |
| 1645 | 0         | 0       | 0     | 0          | 0            | 0      | 0          | 0             |
| 1646 | 0         | 0       | 0     | 0          | 0            | 0      | 0          | 0             |
| 1647 | 0         | 0       | 0     | 0          | 0            | 0      | 0          | 0             |
| 1648 | 0         | 0       | 1     | 1          | 0            | 0      | 0          | 0             |
| 1649 | 0         | 0       | 0     | 0          | 0            | 0      | 0          | 0             |
| 1650 | 0         | 0       | 5     | 0          | 0            | 0      | 0          | 0             |
| 1651 | 0         | 0       | 0     | 0          | 0            | 0      | 0          | 0             |
| 1652 | 0         | 0       | 0     | 0          | 0            | 0      | 0          | 0             |
| 1653 | 0         | 0       | 0     | 0          | 0            | 0      | 0          | 0             |
| 1654 | 0         | 0       | 0     | 0          | 0            | 0      | 0          | 0             |
| 1655 | 0         | 0       | 0     | 0          | 0            | 0      | 0          | 0             |
| 1656 | 0         | 0       | 1     | 0          | 0            | 0      | 0          | 0             |

|      |   |   |   |   |   |   |   |   |
|------|---|---|---|---|---|---|---|---|
| 1657 | 0 | 0 | 0 | 0 | 0 | 0 | 0 | 0 |
| 1658 | 0 | 0 | 0 | 0 | 0 | 0 | 0 | 0 |
| 1659 | 0 | 0 | 0 | 0 | 0 | 0 | 0 | 0 |
| 1660 | 0 | 0 | 1 | 0 | 0 | 0 | 0 | 0 |
| 1661 | 0 | 0 | 1 | 0 | 0 | 0 | 0 | 0 |
| 1662 | 0 | 0 | 0 | 0 | 0 | 0 | 0 | 0 |
| 1663 | 0 | 4 | 0 | 0 | 0 | 1 | 0 | 0 |
| 1664 | 0 | 0 | 0 | 0 | 0 | 0 | 0 | 0 |
| 1665 | 1 | 0 | 2 | 0 | 0 | 0 | 0 | 0 |
| 1666 | 0 | 0 | 1 | 0 | 0 | 0 | 0 | 0 |
| 1667 | 0 | 0 | 0 | 0 | 0 | 0 | 0 | 0 |
| 1668 | 0 | 1 | 1 | 0 | 0 | 0 | 0 | 0 |
| 1669 | 0 | 0 | 0 | 0 | 0 | 0 | 0 | 0 |
| 1670 | 0 | 0 | 0 | 0 | 0 | 0 | 0 | 0 |
| 1671 | 0 | 0 | 0 | 0 | 0 | 0 | 0 | 0 |
| 1672 | 0 | 0 | 0 | 0 | 0 | 0 | 0 | 0 |
| 1673 | 0 | 0 | 0 | 0 | 0 | 1 | 0 | 0 |
| 1674 | 0 | 1 | 1 | 0 | 1 | 1 | 0 | 0 |
| 1675 | 1 | 0 | 0 | 0 | 1 | 5 | 0 | 0 |
| 1676 | 0 | 0 | 0 | 1 | 0 | 0 | 0 | 0 |
| 1677 | 0 | 0 | 0 | 0 | 0 | 0 | 0 | 0 |
| 1678 | 0 | 0 | 2 | 0 | 0 | 0 | 0 | 0 |
| 1679 | 0 | 0 | 0 | 0 | 0 | 0 | 0 | 0 |
| 1680 | 1 | 0 | 2 | 1 | 0 | 0 | 0 | 3 |
| 1681 | 0 | 0 | 0 | 0 | 1 | 2 | 0 | 0 |
| 1682 | 0 | 0 | 0 | 0 | 0 | 1 | 0 | 0 |
| 1683 | 0 | 0 | 0 | 0 | 0 | 0 | 0 | 0 |
| 1684 | 0 | 1 | 0 | 0 | 0 | 0 | 0 | 0 |
| 1685 | 0 | 0 | 1 | 0 | 0 | 0 | 0 | 0 |
| 1686 | 0 | 0 | 0 | 0 | 0 | 0 | 0 | 0 |
| 1687 | 0 | 0 | 3 | 0 | 0 | 0 | 0 | 0 |
| 1688 | 0 | 0 | 0 | 0 | 0 | 0 | 0 | 0 |
| 1689 | 0 | 0 | 2 | 0 | 0 | 0 | 0 | 0 |
| 1690 | 0 | 0 | 0 | 0 | 0 | 0 | 0 | 0 |
| 1691 | 0 | 0 | 1 | 0 | 1 | 1 | 0 | 0 |
| 1692 | 0 | 0 | 1 | 0 | 0 | 0 | 0 | 0 |
| 1693 | 0 | 1 | 0 | 0 | 0 | 0 | 0 | 0 |
| 1694 | 0 | 0 | 0 | 0 | 0 | 0 | 0 | 0 |
| 1695 | 0 | 0 | 0 | 0 | 0 | 0 | 0 | 0 |
| 1696 | 0 | 0 | 0 | 0 | 0 | 0 | 0 | 0 |
| 1697 | 0 | 0 | 0 | 0 | 0 | 0 | 0 | 0 |
| 1698 | 0 | 0 | 1 | 0 | 0 | 0 | 0 | 0 |
| 1699 | 0 | 0 | 1 | 0 | 0 | 0 | 0 | 0 |
| 1700 | 1 | 0 | 0 | 0 | 0 | 0 | 0 | 0 |
| 1701 | 0 | 0 | 1 | 0 | 0 | 0 | 0 | 0 |
| 1702 | 0 | 0 | 0 | 0 | 0 | 0 | 0 | 0 |
| 1703 | 0 | 0 | 0 | 0 | 1 | 0 | 0 | 0 |
| 1704 | 0 | 0 | 0 | 0 | 0 | 0 | 0 | 0 |
| 1705 | 0 | 0 | 0 | 0 | 0 | 0 | 0 | 0 |
| 1706 | 0 | 0 | 0 | 0 | 0 | 0 | 0 | 0 |
| 1707 | 0 | 0 | 0 | 0 | 0 | 0 | 0 | 0 |
| 1708 | 0 | 0 | 0 | 0 | 0 | 0 | 0 | 0 |
| 1709 | 0 | 1 | 0 | 0 | 0 | 0 | 0 | 0 |
| 1710 | 0 | 1 | 0 | 0 | 0 | 0 | 0 | 0 |
| 1711 | 0 | 0 | 0 | 0 | 0 | 0 | 0 | 0 |
| 1712 | 0 | 0 | 0 | 0 | 0 | 0 | 0 | 0 |
| 1713 | 0 | 0 | 4 | 0 | 0 | 0 | 0 | 0 |
| 1714 | 0 | 0 | 0 | 0 | 0 | 0 | 0 | 0 |
| 1715 | 0 | 0 | 2 | 0 | 0 | 0 | 0 | 0 |
| 1716 | 0 | 0 | 2 | 0 | 1 | 0 | 0 | 0 |
| 1717 | 0 | 0 | 0 | 0 | 0 | 0 | 0 | 0 |
| 1718 | 0 | 2 | 0 | 0 | 0 | 0 | 0 | 0 |

|      |   |   |   |   |   |   |   |   |
|------|---|---|---|---|---|---|---|---|
| 1719 | 0 | 0 | 0 | 0 | 0 | 0 | 0 | 0 |
| 1720 | 0 | 0 | 0 | 0 | 0 | 0 | 0 | 0 |
| 1721 | 0 | 0 | 0 | 0 | 0 | 0 | 0 | 0 |
| 1722 | 0 | 0 | 0 | 0 | 0 | 0 | 0 | 0 |
| 1723 | 0 | 0 | 1 | 1 | 0 | 0 | 0 | 0 |
| 1724 | 0 | 1 | 1 | 0 | 0 | 0 | 0 | 0 |
| 1725 | 0 | 1 | 1 | 0 | 0 | 0 | 0 | 0 |
| 1726 | 0 | 0 | 0 | 0 | 0 | 0 | 0 | 0 |
| 1727 | 0 | 0 | 0 | 0 | 0 | 0 | 0 | 0 |
| 1728 | 1 | 0 | 0 | 0 | 2 | 0 | 0 | 0 |
| 1729 | 0 | 0 | 0 | 0 | 0 | 0 | 0 | 0 |
| 1730 | 0 | 0 | 0 | 0 | 1 | 0 | 0 | 0 |
| 1731 | 0 | 0 | 2 | 0 | 1 | 1 | 0 | 0 |
| 1732 | 1 | 0 | 0 | 0 | 1 | 2 | 0 | 2 |
| 1733 | 0 | 0 | 0 | 1 | 0 | 2 | 0 | 0 |
| 1734 | 0 | 0 | 0 | 0 | 0 | 0 | 0 | 0 |
| 1735 | 0 | 0 | 0 | 0 | 0 | 0 | 0 | 0 |
| 1736 | 0 | 0 | 1 | 0 | 0 | 0 | 0 | 0 |
| 1737 | 0 | 0 | 0 | 0 | 0 | 0 | 0 | 0 |
| 1738 | 1 | 0 | 0 | 0 | 0 | 0 | 0 | 0 |
| 1739 | 0 | 0 | 0 | 0 | 0 | 0 | 0 | 0 |
| 1740 | 0 | 0 | 0 | 0 | 0 | 0 | 1 | 0 |
| 1741 | 0 | 0 | 1 | 0 | 0 | 0 | 0 | 0 |
| 1742 | 0 | 0 | 1 | 0 | 0 | 0 | 0 | 0 |
| 1743 | 0 | 0 | 0 | 0 | 0 | 0 | 0 | 0 |
| 1744 | 0 | 1 | 0 | 0 | 0 | 0 | 0 | 0 |
| 1745 | 0 | 1 | 0 | 0 | 1 | 0 | 0 | 0 |
| 1746 | 0 | 0 | 0 | 0 | 0 | 0 | 0 | 0 |
| 1747 | 0 | 1 | 0 | 0 | 0 | 0 | 0 | 0 |
| 1748 | 0 | 0 | 0 | 0 | 0 | 0 | 0 | 0 |
| 1749 | 0 | 0 | 0 | 0 | 0 | 0 | 0 | 0 |
| 1750 | 0 | 0 | 0 | 0 | 1 | 0 | 0 | 0 |
| 1751 | 0 | 0 | 2 | 1 | 0 | 0 | 0 | 0 |
| 1752 | 0 | 0 | 0 | 1 | 0 | 0 | 0 | 0 |
| 1753 | 0 | 0 | 1 | 0 | 0 | 0 | 0 | 0 |
| 1754 | 0 | 0 | 1 | 0 | 0 | 0 | 0 | 0 |
| 1755 | 0 | 0 | 0 | 0 | 0 | 0 | 0 | 0 |
| 1756 | 0 | 0 | 1 | 0 | 0 | 0 | 0 | 0 |
| 1757 | 0 | 0 | 4 | 2 | 0 | 0 | 0 | 0 |
| 1758 | 0 | 2 | 0 | 1 | 1 | 0 | 0 | 0 |
| 1759 | 0 | 0 | 0 | 0 | 0 | 1 | 0 | 0 |
| 1760 | 0 | 0 | 0 | 0 | 0 | 0 | 0 | 0 |
| 1761 | 0 | 1 | 0 | 0 | 0 | 0 | 0 | 0 |
| 1762 | 0 | 2 | 0 | 0 | 0 | 1 | 0 | 0 |
| 1763 | 0 | 0 | 0 | 1 | 0 | 0 | 0 | 0 |
| 1764 | 0 | 0 | 0 | 0 | 0 | 0 | 0 | 0 |
| 1765 | 0 | 2 | 2 | 0 | 0 | 1 | 1 | 0 |
| 1766 | 0 | 0 | 1 | 0 | 0 | 0 | 0 | 0 |
| 1767 | 0 | 2 | 1 | 0 | 0 | 0 | 0 | 0 |
| 1768 | 0 | 2 | 0 | 0 | 0 | 0 | 0 | 0 |
| 1769 | 0 | 0 | 0 | 0 | 0 | 1 | 0 | 0 |
| 1770 | 0 | 8 | 0 | 0 | 0 | 1 | 0 | 0 |
| 1771 | 0 | 3 | 0 | 0 | 0 | 0 | 0 | 0 |
| 1772 | 0 | 1 | 0 | 0 | 1 | 0 | 0 | 0 |
| 1773 | 0 | 0 | 0 | 0 | 0 | 0 | 0 | 0 |
| 1774 | 0 | 0 | 0 | 0 | 0 | 0 | 0 | 0 |
| 1775 | 0 | 0 | 1 | 0 | 1 | 0 | 0 | 0 |
| 1776 | 0 | 1 | 1 | 0 | 0 | 0 | 0 | 0 |
| 1777 | 0 | 0 | 0 | 0 | 0 | 0 | 0 | 0 |
| 1778 | 0 | 1 | 0 | 0 | 0 | 0 | 0 | 0 |
| 1779 | 0 | 0 | 2 | 0 | 0 | 0 | 0 | 0 |
| 1780 | 0 | 1 | 0 | 0 | 0 | 0 | 0 | 0 |



|      |   |   |   |   |   |   |   |   |
|------|---|---|---|---|---|---|---|---|
| 1781 | 3 | 0 | 0 | 0 | 0 | 0 | 0 | 0 |
| 1782 | 5 | 0 | 0 | 1 | 0 | 0 | 0 | 0 |
| 1783 | 3 | 0 | 0 | 0 | 2 | 2 | 0 | 0 |
| 1784 | 0 | 1 | 1 | 0 | 3 | 5 | 0 | 0 |
| 1785 | 0 | 2 | 0 | 0 | 0 | 0 | 0 | 0 |
| 1786 | 8 | 0 | 1 | 0 | 6 | 3 | 1 | 0 |
| 1787 | 3 | 0 | 0 | 1 | 6 | 2 | 0 | 0 |
| 1788 | 0 | 0 | 0 | 0 | 2 | 0 | 0 | 0 |
| 1789 | 2 | 0 | 2 | 0 | 2 | 0 | 0 | 0 |
| 1790 | 0 | 4 | 1 | 0 | 0 | 0 | 0 | 0 |
| 1791 | 0 | 1 | 0 | 0 | 1 | 0 | 0 | 0 |
| 1792 | 1 | 0 | 1 | 1 | 0 | 0 | 1 | 0 |
| 1793 | 0 | 1 | 0 | 1 | 0 | 0 | 0 | 0 |
| 1794 | 0 | 4 | 1 | 0 | 0 | 0 | 0 | 0 |
| 1795 | 0 | 0 | 0 | 1 | 0 | 0 | 0 | 0 |
| 1796 | 0 | 0 | 0 | 0 | 1 | 0 | 0 | 0 |
| 1797 | 0 | 4 | 0 | 0 | 0 | 0 | 0 | 0 |
| 1798 | 0 | 0 | 3 | 1 | 0 | 1 | 0 | 0 |
| 1799 | 0 | 1 | 0 | 0 | 0 | 0 | 0 | 0 |
| 1800 | 3 | 0 | 0 | 0 | 0 | 0 | 0 | 0 |
| 1801 | 0 | 0 | 0 | 0 | 0 | 0 | 0 | 0 |
| 1802 | 0 | 0 | 0 | 0 | 0 | 0 | 1 | 0 |
| 1803 | 0 | 0 | 0 | 0 | 0 | 0 | 0 | 0 |
| 1804 | 0 | 0 | 2 | 0 | 0 | 0 | 0 | 0 |
| 1805 | 0 | 3 | 0 | 0 | 0 | 0 | 0 | 0 |
| 1806 | 0 | 0 | 0 | 0 | 1 | 0 | 0 | 0 |
| 1807 | 0 | 0 | 0 | 0 | 1 | 0 | 2 | 1 |
| 1808 | 1 | 0 | 1 | 1 | 0 | 0 | 0 | 0 |
| 1809 | 0 | 1 | 0 | 0 | 0 | 0 | 0 | 0 |
| 1810 | 0 | 0 | 0 | 0 | 0 | 0 | 0 | 0 |
| 1811 | 0 | 0 | 0 | 0 | 0 | 0 | 0 | 0 |
| 1812 | 0 | 0 | 0 | 0 | 0 | 0 | 0 | 0 |
| 1813 | 0 | 1 | 0 | 0 | 0 | 0 | 0 | 0 |
| 1814 | 0 | 1 | 0 | 1 | 0 | 1 | 0 | 0 |
| 1815 | 0 | 0 | 2 | 0 | 0 | 0 | 0 | 0 |
| 1816 | 0 | 0 | 0 | 1 | 1 | 0 | 0 | 0 |
| 1817 | 0 | 2 | 0 | 0 | 0 | 0 | 0 | 1 |
| 1818 | 0 | 4 | 0 | 0 | 0 | 0 | 0 | 0 |
| 1819 | 0 | 0 | 0 | 0 | 0 | 0 | 0 | 0 |
| 1820 | 0 | 0 | 0 | 0 | 0 | 0 | 0 | 0 |
| 1821 | 0 | 2 | 0 | 0 | 1 | 0 | 1 | 0 |
| 1822 | 0 | 1 | 1 | 2 | 0 | 0 | 0 | 0 |
| 1823 | 0 | 1 | 0 | 1 | 0 | 0 | 1 | 0 |
| 1824 | 0 | 0 | 0 | 0 | 0 | 0 | 0 | 0 |
| 1825 | 1 | 0 | 0 | 0 | 2 | 0 | 0 | 3 |
| 1826 | 0 | 0 | 0 | 1 | 0 | 0 | 0 | 0 |
| 1827 | 0 | 1 | 0 | 0 | 0 | 0 | 0 | 0 |
| 1828 | 0 | 0 | 0 | 1 | 0 | 0 | 0 | 0 |
| 1829 | 1 | 0 | 0 | 0 | 0 | 0 | 0 | 0 |
| 1830 | 0 | 0 | 0 | 0 | 0 | 1 | 0 | 0 |
| 1831 | 0 | 0 | 0 | 0 | 1 | 0 | 0 | 0 |
| 1832 | 0 | 4 | 0 | 0 | 4 | 2 | 0 | 0 |
| 1833 | 2 | 1 | 0 | 0 | 2 | 4 | 0 | 1 |
| 1834 | 0 | 0 | 0 | 0 | 2 | 3 | 0 | 0 |
| 1835 | 2 | 0 | 1 | 0 | 3 | 1 | 0 | 0 |
| 1836 | 5 | 0 | 0 | 0 | 6 | 7 | 1 | 3 |
| 1837 | 0 | 1 | 2 | 0 | 0 | 3 | 6 | 0 |
| 1838 | 0 | 1 | 0 | 0 | 1 | 0 | 0 | 0 |
| 1839 | 0 | 1 | 0 | 0 | 1 | 0 | 0 | 1 |
| 1840 | 0 | 1 | 0 | 1 | 0 | 0 | 0 | 0 |
| 1841 | 0 | 1 | 1 | 0 | 2 | 1 | 0 | 1 |
| 1842 | 0 | 0 | 1 | 0 | 0 | 0 | 0 | 0 |

|      |   |   |   |   |   |   |   |   |
|------|---|---|---|---|---|---|---|---|
| 1843 | 0 | 0 | 0 | 0 | 0 | 0 | 1 | 0 |
| 1844 | 0 | 1 | 0 | 0 | 0 | 0 | 0 | 0 |
| 1845 | 0 | 0 | 0 | 0 | 0 | 0 | 0 | 0 |
| 1846 | 0 | 0 | 0 | 0 | 0 | 0 | 0 | 0 |
| 1847 | 0 | 0 | 0 | 0 | 0 | 0 | 0 | 0 |
| 1848 | 0 | 1 | 2 | 0 | 0 | 0 | 0 | 0 |
| 1849 | 0 | 0 | 0 | 0 | 0 | 0 | 0 | 0 |
| 1850 | 0 | 0 | 3 | 0 | 1 | 1 | 2 | 0 |
| 1851 | 0 | 2 | 1 | 1 | 0 | 0 | 0 | 0 |
| 1852 | 0 | 2 | 0 | 1 | 0 | 0 | 0 | 0 |
| 1853 | 0 | 5 | 0 | 0 | 0 | 0 | 0 | 0 |
| 1854 | 0 | 0 | 3 | 0 | 1 | 1 | 0 | 0 |
| 1855 | 1 | 1 | 3 | 1 | 1 | 0 | 1 | 0 |
| 1856 | 0 | 2 | 0 | 3 | 1 | 0 | 0 | 0 |
| 1857 | 0 | 0 | 2 | 1 | 0 | 0 | 0 | 0 |
| 1858 | 0 | 0 | 1 | 0 | 0 | 0 | 0 | 1 |
| 1859 | 0 | 0 | 0 | 0 | 0 | 0 | 0 | 0 |
| 1860 | 3 | 0 | 2 | 0 | 2 | 0 | 2 | 0 |
| 1861 | 0 | 1 | 1 | 0 | 0 | 1 | 0 | 0 |
| 1862 | 0 | 0 | 1 | 0 | 0 | 0 | 0 | 0 |
| 1863 | 0 | 1 | 0 | 0 | 0 | 0 | 0 | 0 |
| 1864 | 0 | 0 | 1 | 1 | 0 | 0 | 0 | 0 |
| 1865 | 2 | 0 | 3 | 1 | 1 | 0 | 0 | 0 |
| 1866 | 3 | 1 | 1 | 0 | 3 | 1 | 1 | 0 |
| 1867 | 0 | 1 | 0 | 0 | 0 | 1 | 0 | 0 |
| 1868 | 1 | 0 | 1 | 0 | 1 | 0 | 0 | 0 |
| 1869 | 0 | 0 | 1 | 0 | 1 | 1 | 0 | 0 |
| 1870 | 0 | 0 | 1 | 0 | 0 | 0 | 1 | 0 |
| 1871 | 0 | 0 | 0 | 0 | 0 | 0 | 1 | 0 |
| 1872 | 0 | 0 | 0 | 0 | 0 | 0 | 0 | 0 |
| 1873 | 0 | 0 | 0 | 0 | 0 | 0 | 0 | 0 |
| 1874 | 0 | 0 | 0 | 0 | 0 | 0 | 0 | 0 |
| 1875 | 0 | 0 | 0 | 0 | 0 | 0 | 0 | 0 |
| 1876 | 0 | 0 | 0 | 0 | 0 | 0 | 0 | 0 |
| 1877 | 0 | 0 | 0 | 0 | 0 | 0 | 0 | 0 |
| 1878 | 0 | 0 | 0 | 0 | 0 | 0 | 0 | 0 |
| 1879 | 0 | 0 | 1 | 0 | 0 | 0 | 0 | 0 |
| 1880 | 0 | 0 | 0 | 0 | 0 | 0 | 0 | 0 |
| 1881 | 0 | 1 | 0 | 0 | 0 | 0 | 0 | 0 |
| 1882 | 0 | 0 | 1 | 0 | 0 | 0 | 0 | 0 |
| 1883 | 0 | 0 | 0 | 0 | 0 | 0 | 0 | 0 |
| 1884 | 0 | 0 | 2 | 0 | 0 | 0 | 0 | 0 |
| 1885 | 0 | 0 | 0 | 0 | 0 | 0 | 0 | 0 |
| 1886 | 0 | 0 | 0 | 0 | 0 | 0 | 0 | 0 |
| 1887 | 0 | 0 | 0 | 0 | 0 | 0 | 0 | 0 |
| 1888 | 0 | 0 | 0 | 0 | 0 | 0 | 0 | 0 |
| 1889 | 0 | 0 | 0 | 0 | 0 | 0 | 0 | 0 |
| 1890 | 0 | 0 | 0 | 0 | 0 | 0 | 0 | 0 |
| 1891 | 0 | 0 | 1 | 0 | 0 | 0 | 0 | 0 |
| 1892 | 0 | 0 | 1 | 0 | 0 | 0 | 0 | 0 |
| 1893 | 0 | 0 | 1 | 0 | 0 | 0 | 0 | 0 |
| 1894 | 0 | 0 | 0 | 0 | 0 | 0 | 0 | 0 |
| 1895 | 0 | 0 | 0 | 0 | 0 | 0 | 0 | 0 |
| 1896 | 0 | 0 | 1 | 1 | 0 | 0 | 0 | 0 |
| 1897 | 0 | 0 | 1 | 0 | 0 | 0 | 0 | 0 |
| 1898 | 0 | 0 | 1 | 0 | 0 | 0 | 0 | 0 |
| 1899 | 0 | 0 | 0 | 0 | 0 | 0 | 0 | 0 |
| 1900 | 0 | 0 | 0 | 0 | 0 | 0 | 0 | 0 |

---

30 Table S3 Mean numbers of days and the mean precipitation of Baiu duration for drought/long-rain years extracted by disaster records in the Town/City histories together with the number of disaster years extracted (n) and the significance level (p-value) of the difference between the mean values for disaster years and all years in the analyzed period.

| Number of disaster descriptions | The mean number of days<br>(37, 1751–1900) |                       |                       |                      | The mean precipitation (mm)<br>(351, 1701–1900) |                        |                        |                       |
|---------------------------------|--------------------------------------------|-----------------------|-----------------------|----------------------|-------------------------------------------------|------------------------|------------------------|-----------------------|
|                                 | ≥ 1                                        | ≥ 2                   | ≥ 3                   | ≥ 4                  | ≥ 1                                             | ≥ 2                    | ≥ 3                    | ≥ 4                   |
| Drought                         | 35 (n=49)<br>(p>0.05)                      | 32 (n=20)<br>(p>0.05) | 27 (n=9)<br>(p<0.01)  | 27 (n=7)<br>(p<0.05) | 315 (n=57)<br>(p>0.05)                          | 265 (n=21)<br>(p<0.05) | 193 (n=9)<br>(p<0.001) | 193 (n=7)<br>(p<0.01) |
| Long rain                       | 42 (n=19)<br>(p>0.05)                      | 45 (n=13)<br>(p<0.05) | 48 (n=9)<br>(p<0.001) | 51 (n=3)<br>(p<0.05) | 475 (n=22)<br>(p<0.01)                          | 473 (n=13)<br>(p<0.01) | 492 (n=9)<br>(p<0.01)  | 645 (n=3)<br>(p<0.05) |
